# Supplementary material
Source: MDPI journal article supplement (https://www.mdpi.com/2673-4540/5/1/7)
Supplement: s1 [file s1 › diabetology-2824086-supplementary.pdf]

## Demographic Information

1. **What is your Gender?**

- ☐ Female
- ☐ Male
- ☐ Other

2. **What is your age in years?**

- ☐ > 18
- ☐ 18-24
- ☐ 25-34
- ☐ 35-44
- ☐ 45-54
- ☐ 55-64
- ☐ 65 years or older

3. **Do you live in Saudi Arabia?**

- ☐ Australia
- ☐ Saudi Arabia
- ☐ Other

4. **How long have you been living in this country?**

- ☐ Since birth
- ☐ Past 1 year
- ☐ 1-5 years
- ☐ 5-10 years
- ☐ More than 10 years

5. **What is your current residential status?**

- ☐ Citizen
- ☐ Permanent resident
- ☐ Temporary resident
- ☐ Refugee or asylum seeker
- ☐ Other

6. **What is your country of birth?**

7. **What is your nationality?**

8. **What is your ethnic identity?**

- ☐ Egypt
- ☐ Algeria
- ☐ Sudan
- ☐ Iraq
- ☐ Morocco

- Saudi Arabia
- Yemen
- Syria
- Tunisia
- United Arab Emirates
- Jordan
- Libya
- Lebanon
- Palestine
- Oman
- Mauritania
- Kuwait
- Qatar
- Bahrain
- Other please specify

**9. What is your religion?**

- Islam
- Christian
- Druze
- Other

**10. What languages do speak at home other than Arabic?**

**11. What is the highest level of education you have completed?**

- No formal education
- Elementary school (1st grade through 6th grade)
- Middle school (6th, 7th, and 8th grade)
- High school include (Technical and vocational training) (9, 10, 11 and 12 grade)
- Diploma
- University undergraduate degree (bachelor's degree)
- Postgraduate (Master or PhD)

**12. What is your marital status?**

- Married
- Widowed
- De-facto
- Single
- Divorced
- Separated but not divorced

**13. What is your employment status?**

- Retired
- Full-time
- Part-time
- Unemployed
- Don't know/ Not applicable

## Diabetes Control:

**14. How long have you been diagnosed with diabetes?**

- Less than 6 months
- months to 1 year
- 1 year to 3 years
- 3 to 5 years
- over 5 years
- Don't know/ Not applicable

**15. Do you have any other family members who are diagnosed with diabetes?**

- ☐ Yes
- ☐ No

If you answered the previous question “yes” please state what

|  |
|--|
|  |
|--|

**16. Do you have other chronic health conditions?**

- Yes
- No
- Don't know

If you answered the previous question “yes” please state what other conditions you have?

|  |
|--|
|  |
|--|

**17. The questions below ask you about your diabetes self-care activities during the past 7 days. If you were sick during the past 7 days, please think back to the last 7 days that you were not sick. Please circle the most appropriate response where 1 represents strongly unsatisfied and 7 represents strongly satisfied.**

1.

[illegible]

|                                                                                                     |                          |                          |                          |                          |                          |                          |                          |
|-----------------------------------------------------------------------------------------------------|--------------------------|--------------------------|--------------------------|--------------------------|--------------------------|--------------------------|--------------------------|
| eating plan?                                                                                        |                          |                          |                          |                          |                          |                          |                          |
| On how many of the last SEVEN DAYS did you participate in at least 30 minutes of physical activity? | <input type="checkbox"/> |
| On how many of the last SEVEN days did you test your blood sugar?                                   | <input type="checkbox"/> |

**18. What area in your diabetes care do you find most difficult to manage or frustrating? Please select all that apply:**

- ☐ Making healthy diet choices
- ☐ Getting enough physical activities
- ☐ Taking and keeping track of my blood glucose level
- ☐ Communicating with my physician
- ☐ Communicate with other health care providers such as dietitian, nurses, social workers etc.
- ☐ Communicating with friends and families
- ☐ Others please specify

**19. Which of the following diabetes issues are currently a problem for you? Circle the number that gives the best answer for you. Please provide an answer for each question:**

|                                                        | Serious problem          | Somewhat serious problem | Moderate problem         | Minor problem            | Not a problem            |
|--------------------------------------------------------|--------------------------|--------------------------|--------------------------|--------------------------|--------------------------|
| Not having clear and concrete goals for your diabetes? | <input type="checkbox"/> |
| Feeling discouraged with your diabetes treatment plan  | <input type="checkbox"/> |

|                                                                                         |                          |                          |                          |                          |                          |
|-----------------------------------------------------------------------------------------|--------------------------|--------------------------|--------------------------|--------------------------|--------------------------|
| Feeling sick or scared when you think about living with diabetes                        | <input type="checkbox"/> |
| Feeling of guilt or anxiety when you get off track with your diabetes management        | <input type="checkbox"/> |
| Feeling that diabetes is taking up too much of your mental and physical energy everyday | <input type="checkbox"/> |
| Coping with complications of diabetes                                                   | <input type="checkbox"/> |
| Feeling burned out by the constant effort needed to manage diabetes.                    | <input type="checkbox"/> |

## Technology Usage

The following questions will ask you about your web-based technology

20. Do you have access to the internet at home?

- ☐ Yes
- ☐ No
- ☐ Don't know / Not applicable

21. What are you using for accessing the internet?

- ☐ Computer
- ☐ Tablet
- ☐ Smartphone such as an iPhone, BlackBerry, or Android
- ☐ Other please specify

22. The following questions ask about your daily Web-based technology usage: On average how many hours a day do you spend on the Internet?

- ☐ One hour
- ☐ Between 1 to 2hours a day
- ☐ Between 2 to 3 hours a day
- ☐ Over 3 hours a day
- ☐ Don't know / Not applicable

23. What activities do you typically use the internet for? Please select all that apply.

- ☐ Emailing and communicating with friends
- ☐ Social Media (such as Facebook, Twitter, LinkedIn)

- Reading the news or books
- Researching information
- Watching movies or television shows
- Business purposes
- Other (please specify)

## Diabetes self-management using web-based technology1/3:

The following questions will ask you about your opinions on using web-based technology to manage diabetes:

24. Do you use web-based technology to help you manage your diabetes?

- Yes
- No
- Don't Know/Not Applicable

25. If you were to use web-based technology to help manage your diabetes, select what management services you would be interested in:

|                                                                                         | Yes                      | No                       | Don't Know Not Applicable |
|-----------------------------------------------------------------------------------------|--------------------------|--------------------------|---------------------------|
| Dietary Planning                                                                        | <input type="checkbox"/> | <input type="checkbox"/> | <input type="checkbox"/>  |
| Physical Activity Planning                                                              | <input type="checkbox"/> | <input type="checkbox"/> | <input type="checkbox"/>  |
| Text Messaging Monitoring and/or Reminders                                              | <input type="checkbox"/> | <input type="checkbox"/> | <input type="checkbox"/>  |
| Image Messaging Monitoring and/or Reminders                                             | <input type="checkbox"/> | <input type="checkbox"/> | <input type="checkbox"/>  |
| Glucose Reading and Tracking Options                                                    | <input type="checkbox"/> | <input type="checkbox"/> | <input type="checkbox"/>  |
| Communication with other People with Type 2 Diabetes                                    | <input type="checkbox"/> | <input type="checkbox"/> | <input type="checkbox"/>  |
| Communication with diabetes clinicians                                                  | <input type="checkbox"/> | <input type="checkbox"/> | <input type="checkbox"/>  |
| Communication Forum with Other Health Care Providers such as dieticians' nurses, social | <input type="checkbox"/> | <input type="checkbox"/> | <input type="checkbox"/>  |

## 2. Diabetes self-management using web-based technology continued 2/3:

|                                                  | Very bad idea            | Bad idea                 | Neither a bad or good idea | Good idea                | Very good idea           |
|--------------------------------------------------|--------------------------|--------------------------|----------------------------|--------------------------|--------------------------|
| 26. For me, using Web-based technology to assist | <input type="checkbox"/> | <input type="checkbox"/> | <input type="checkbox"/>   | <input type="checkbox"/> | <input type="checkbox"/> |

|                                           |  |  |  |  |  |
|-------------------------------------------|--|--|--|--|--|
| <b>with self-management<br/>would be:</b> |  |  |  |  |  |
|-------------------------------------------|--|--|--|--|--|

|                                                                                                                        |                          |                          |                                        |                          |                          |
|------------------------------------------------------------------------------------------------------------------------|--------------------------|--------------------------|----------------------------------------|--------------------------|--------------------------|
|                                                                                                                        | Extremely<br>unenjoyable | Unenjoyable              | Neither<br>unenjoyable<br>or enjoyable | Enjoyable                | Very<br>enjoyable        |
| <b>27. For me,<br/>using a Web-<br/>based<br/>technology to<br/>assist with<br/>self-<br/>management<br/>would be:</b> | <input type="checkbox"/> | <input type="checkbox"/> | <input type="checkbox"/>               | <input type="checkbox"/> | <input type="checkbox"/> |

|                                                                                                                      |                          |                          |                                              |                          |                          |
|----------------------------------------------------------------------------------------------------------------------|--------------------------|--------------------------|----------------------------------------------|--------------------------|--------------------------|
|                                                                                                                      | Very<br>frightening      | Frightening              | Neighbour<br>frightening<br>or<br>comforting | Comforting               | Very<br>comforting       |
| <b>28. For me,<br/>using Web-<br/>based<br/>technology to<br/>assist with<br/>self-<br/>management<br/>would be:</b> | <input type="checkbox"/> | <input type="checkbox"/> | <input type="checkbox"/>                     | <input type="checkbox"/> | <input type="checkbox"/> |

|                                                                                                                      |                          |                          |                                  |                          |                          |
|----------------------------------------------------------------------------------------------------------------------|--------------------------|--------------------------|----------------------------------|--------------------------|--------------------------|
|                                                                                                                      | Very<br>boring           | Boring                   | Neither<br>boring or<br>exciting | Exciting                 | Very<br>exciting         |
| <b>29. For me,<br/>using Web-<br/>based<br/>technology to<br/>assist with<br/>self-<br/>management<br/>would be:</b> | <input type="checkbox"/> | <input type="checkbox"/> | <input type="checkbox"/>         | <input type="checkbox"/> | <input type="checkbox"/> |



|                                            |  |  |  |  |  |  |
|--------------------------------------------|--|--|--|--|--|--|
| my diabetes<br>management in<br>the future |  |  |  |  |  |  |
|--------------------------------------------|--|--|--|--|--|--|

**34. General comments and additional contact request if you have any additional comments about using web-based technology to manage diabetes please state so here**

- ☐ Yes
- ☐ No

**If your answer is (Yes) for the previous question, please write your comment here:**
